# Supplementary material
Source: publisher figshare collection journal article supplement (https://frontiersin.figshare.com/ndownloader/files/14634722)
Supplement: Supplementary file [file 14634722]

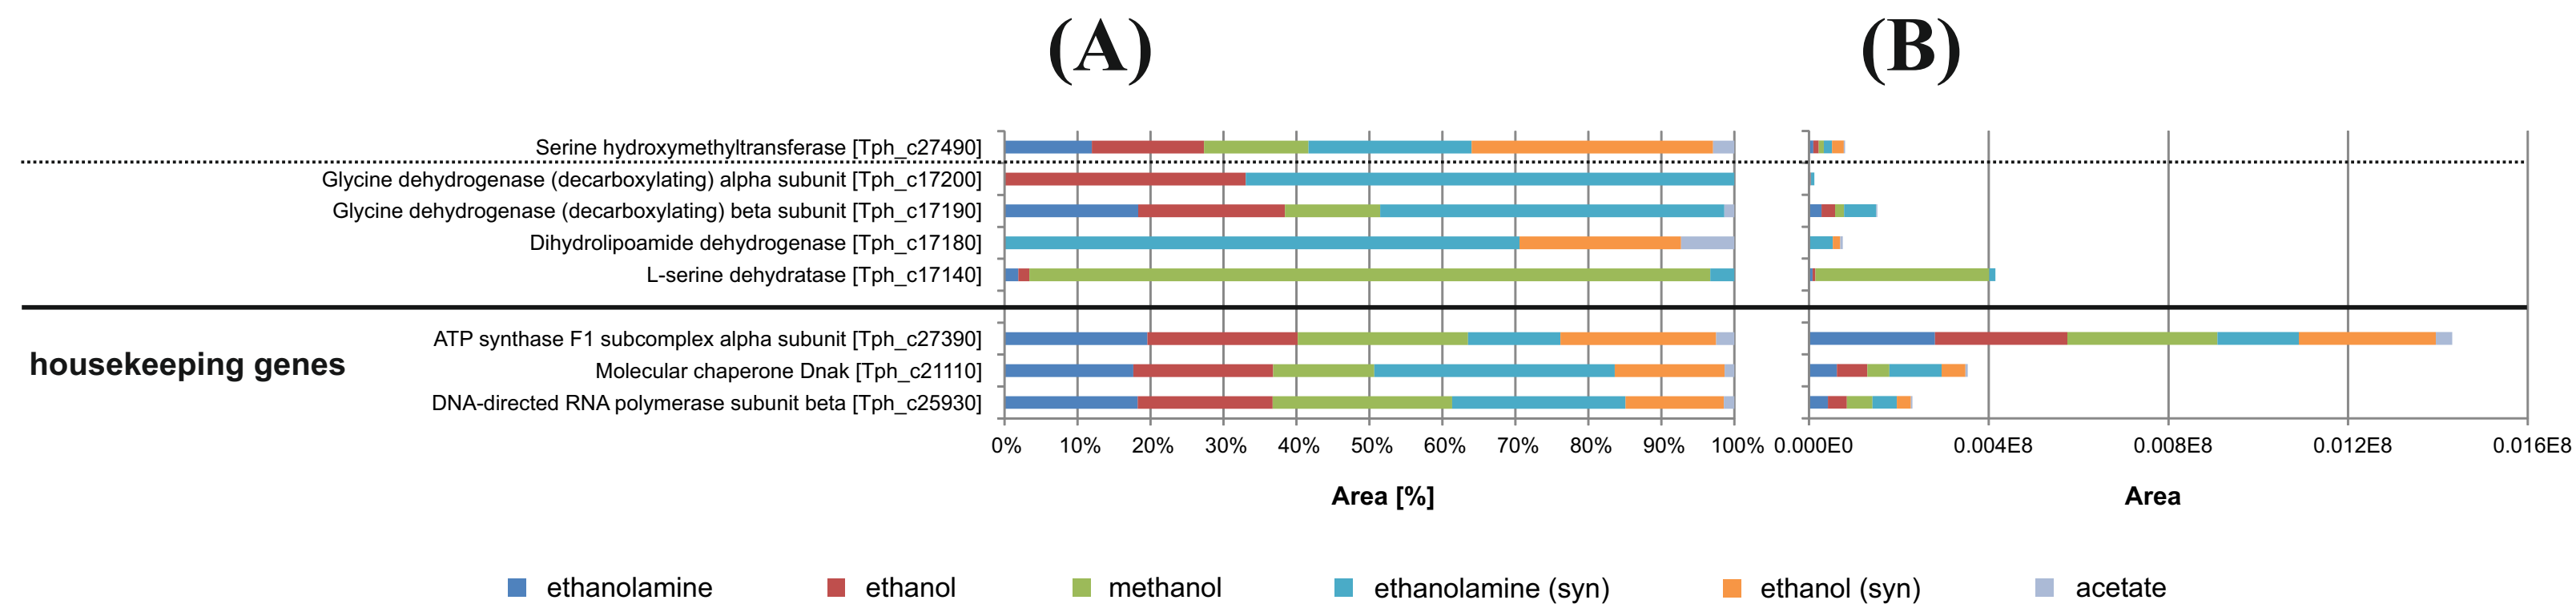

Supplementary Figure 5: Proteome data of the serine hydroxymethyltransferase and the glycine cleavage system obtained during growth of *Thermacetogenium phaeum* with different substrates. Proteins located in different clusters were separated by dashed lines. Housekeeping genes were depicted beneath the solid line. **(A)**: normalized data: percentage of protein abundances (expressed as area of mass spectroscopy signals) under various growth conditions relative to the summed protein abundances (area) of all growth conditions. **(B)**: absolute sums of area values of the respective identified proteins obtained in all growth conditions are shown here.
